# Supplementary material
Source: PubMed Central journal article supplement (PMC5972060)
Supplement: NIHMS945334-supplement.pdf [file NIHMS945334-supplement.pdf]

## Genome-wide Association Study of Dimensional Psychopathology Using Electronic Health Records

### Supplemental Information

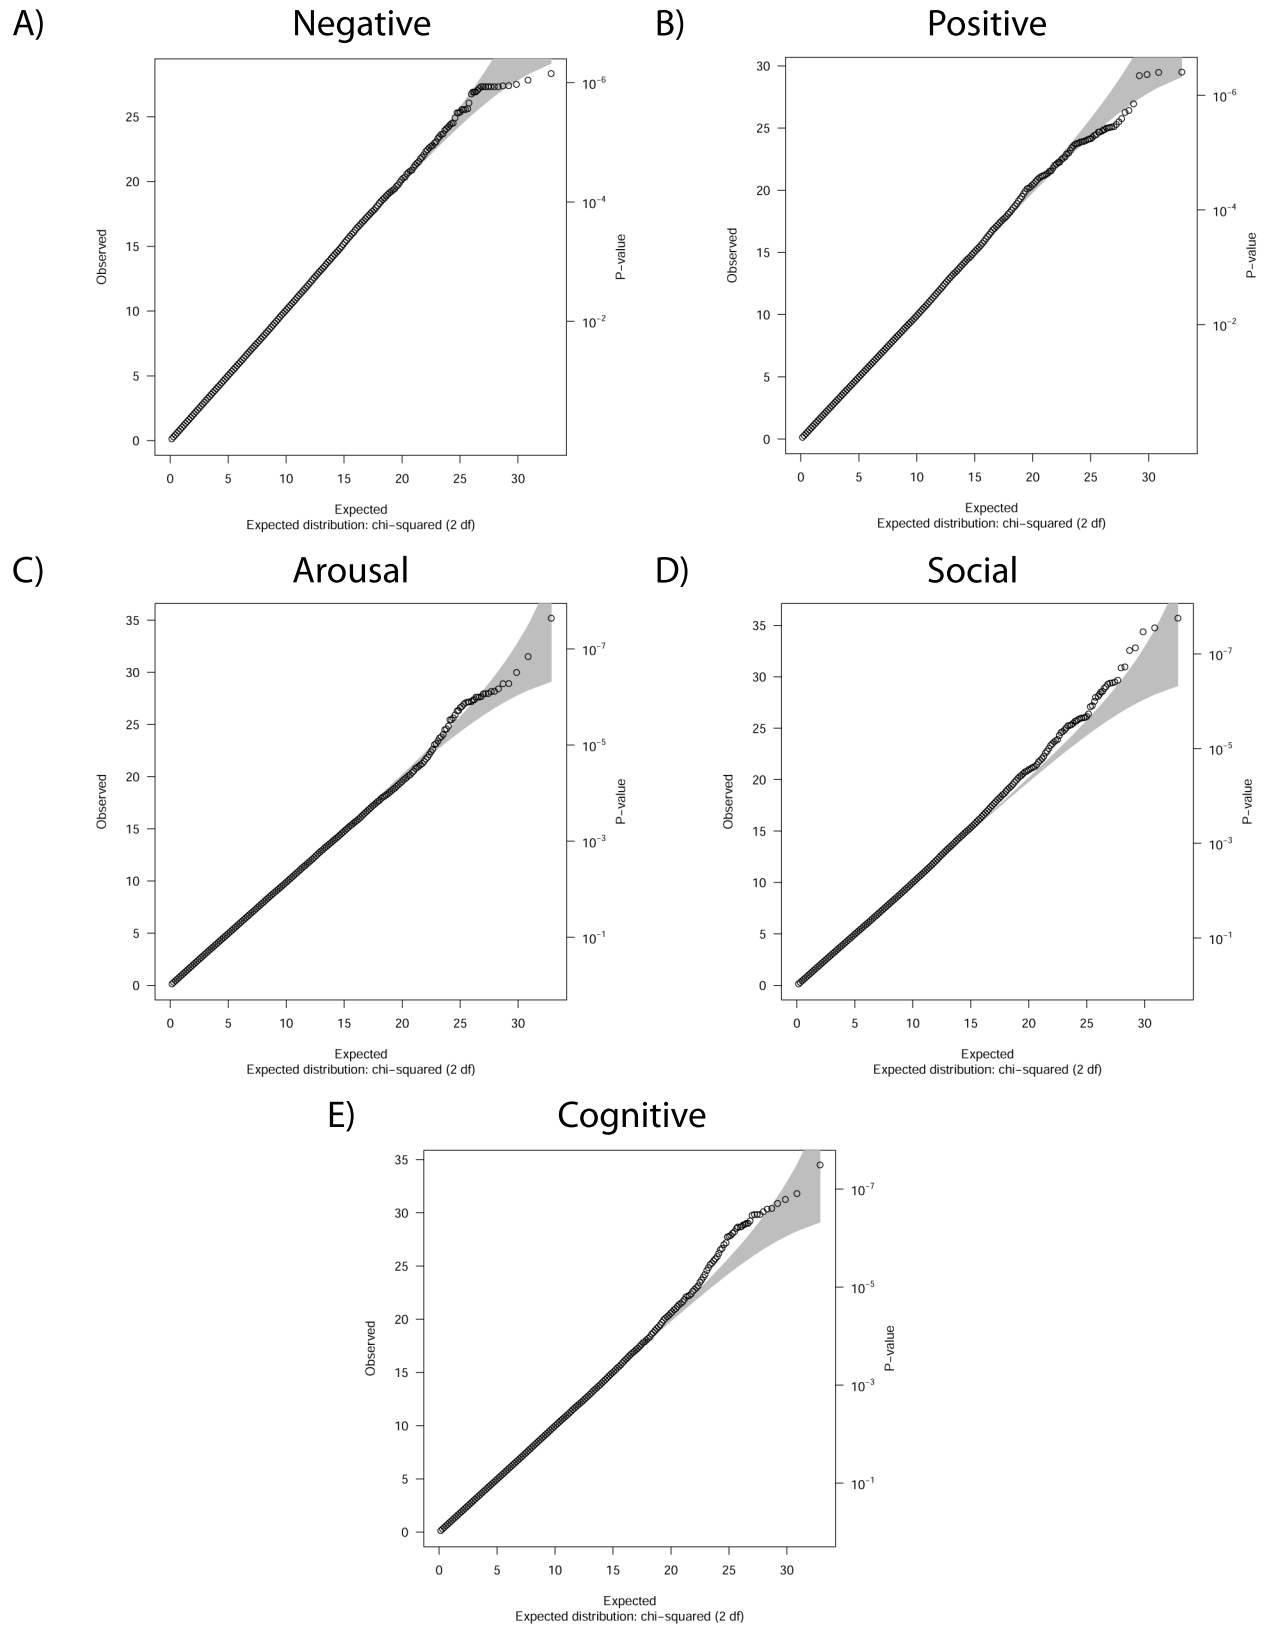

**Supplemental Figure S1: Q-Q plots for each of the five dimensions of psychopathology.**
